# Supplementary material
Source: MDPI journal article supplement (https://www.mdpi.com/2072-4292/11/7/798)
Supplement: s1 [file s1]

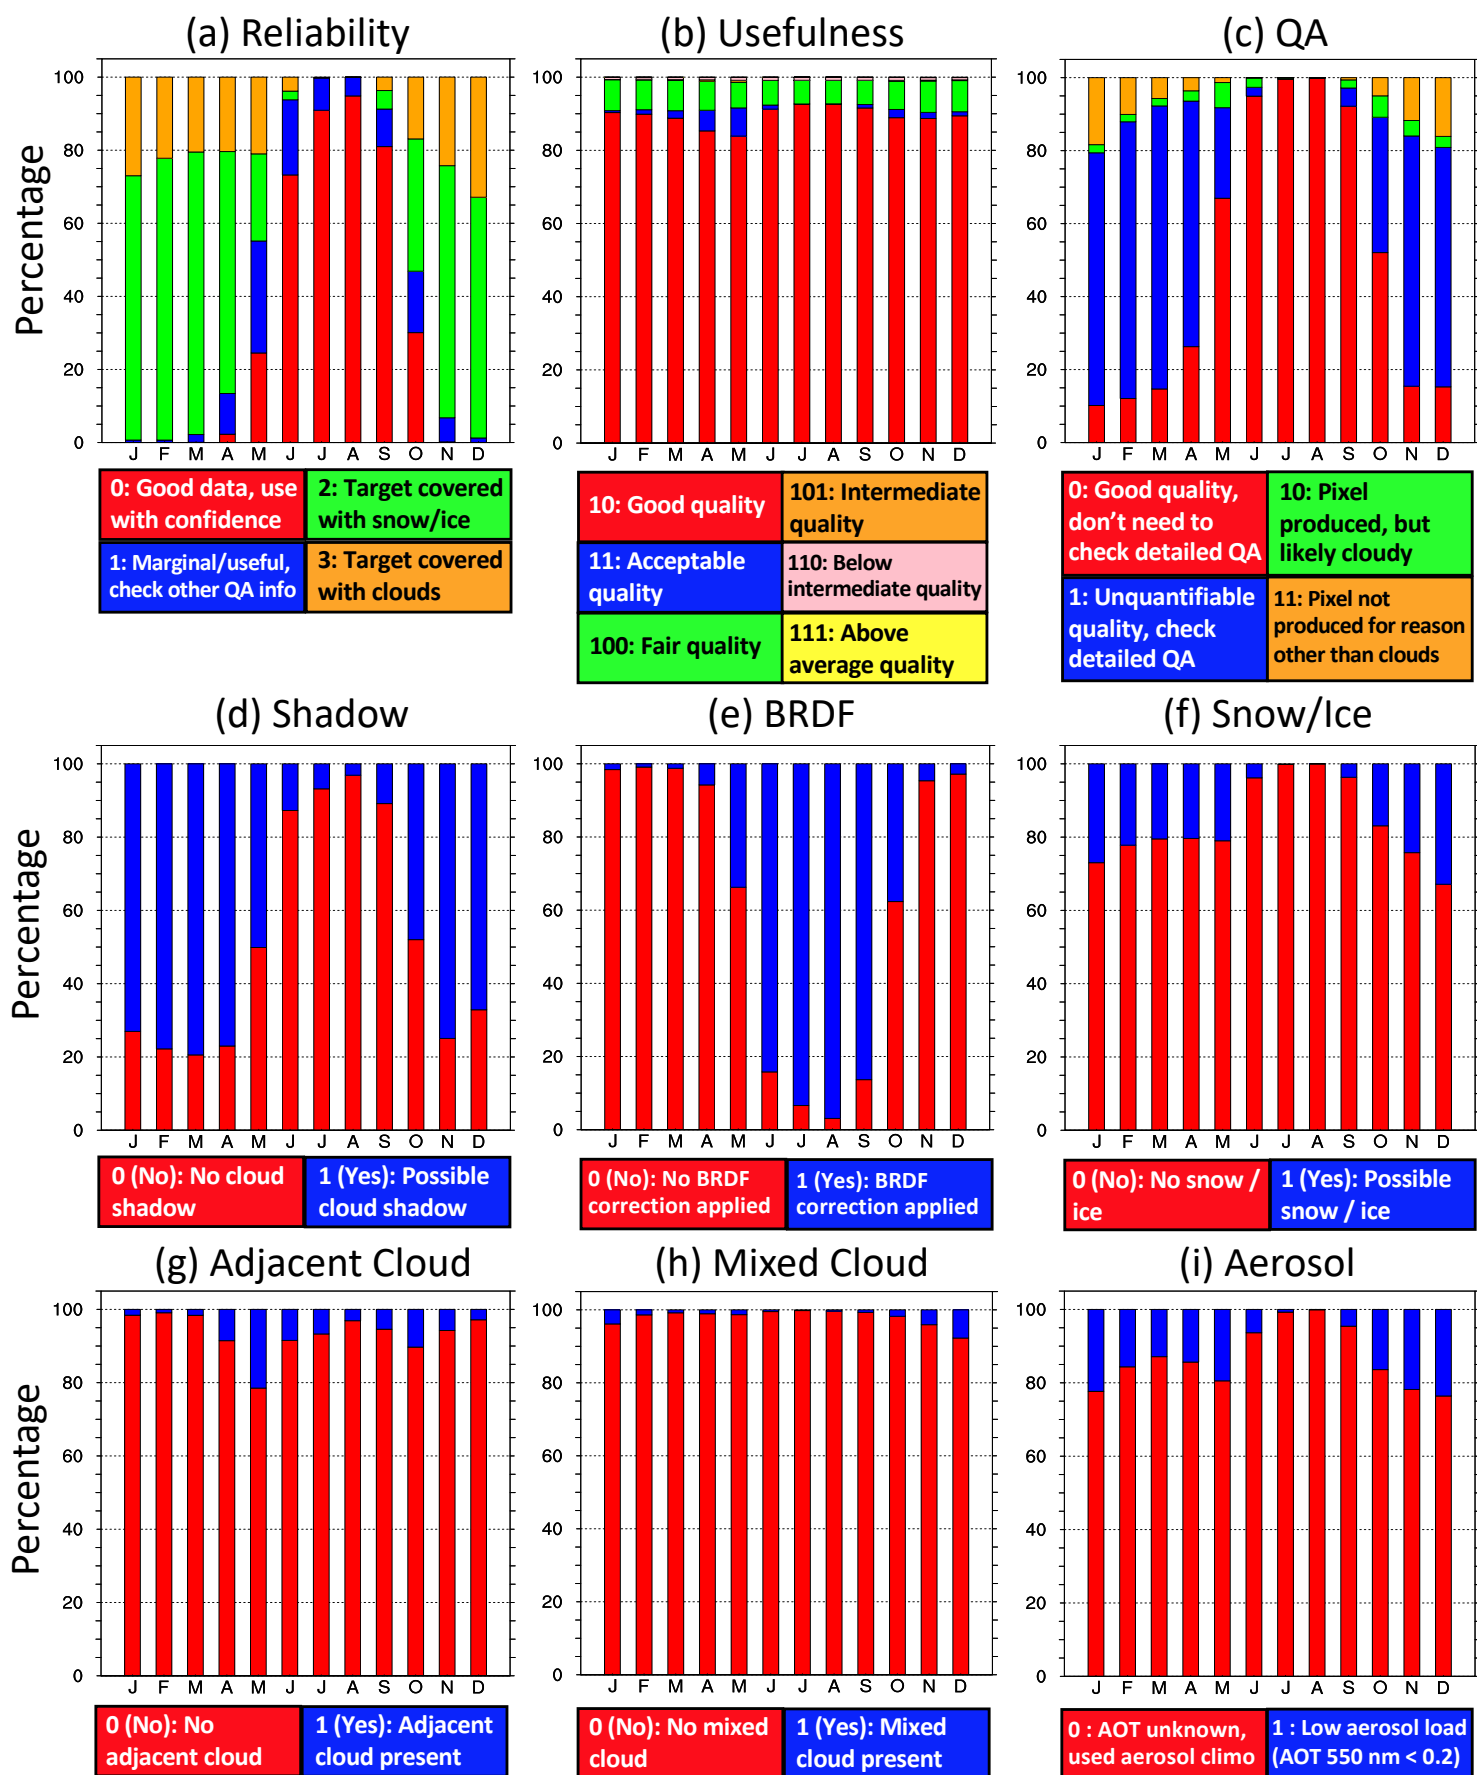

Supp. Figure 1. Seasonal cycle of quality assurance (QA) indices for MODIS vegetation indices (VI) across Yellowstone during 2000-2017, shown as percentage of data fitting into each color-coded category. Indices include (a) pixel reliability and multiple quality measures, including (b) VI usefulness, (c) MODIS land (MODLAND) QA, (d) cloud shadow presence, (e) atmospheric bidirectional reflectance distribution function (BRDF) correction application, (f) snow/ice presence, (g) adjacent cloud presence, (h) mixed cloud presence, and (i) aerosol quantity.
